# Supplementary material for: Associations between the indoor microbiome, environmental characteristics and respiratory infections in junior high school students of Johor Bahru, Malaysia
Source: Royal Society of Chemistry journal article supplement (doi:10.1039/d1em00115a), 2021-01-01
Supplement: d1em00115a1.pdf [file d1em00115a1.pdf]

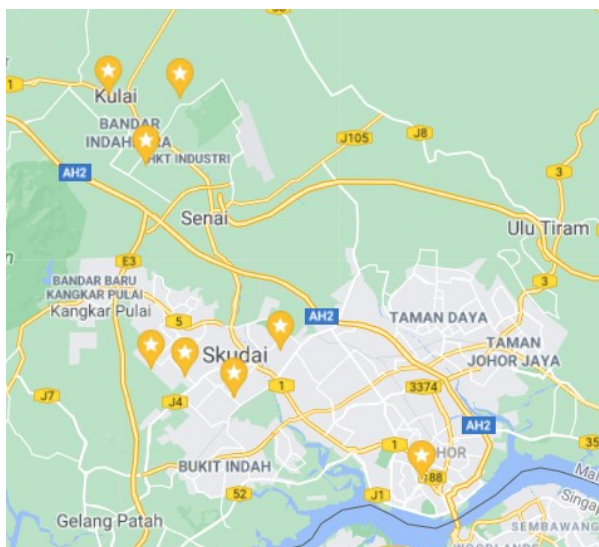

Figure S1. School locations. The eight schools that we surveyed in this study were labeled with stars.
